# Supplementary material for: Unexpected reactivity of Au25(SCH2CH2Ph)18 nanoclusters with salts
Source: Royal Society of Chemistry journal article supplement (doi:10.1039/c0nr00878h), 2011-01-01
Supplement: c0nr00878h.pdf [file c0nr00878h.pdf]

## Supporting Information

### Unexpected Reactivity of $\text{Au}_{25}(\text{SCH}_2\text{CH}_2\text{Ph})_{18}$ Nanoclusters with Salts

Manzhou Zhu,<sup>1\*</sup> Gerentt Chan,<sup>2</sup> Huifeng Qian<sup>2</sup> and Rongchao Jin<sup>2</sup>

<sup>1</sup>Department of Chemistry, Anhui University, Hefei, Anhui 230026 P. R. China

<sup>2</sup>Department of Chemistry, Carnegie Mellon University, Pittsburgh, Pennsylvania, U. S. A.

#### 1. Supporting Figures and Table:

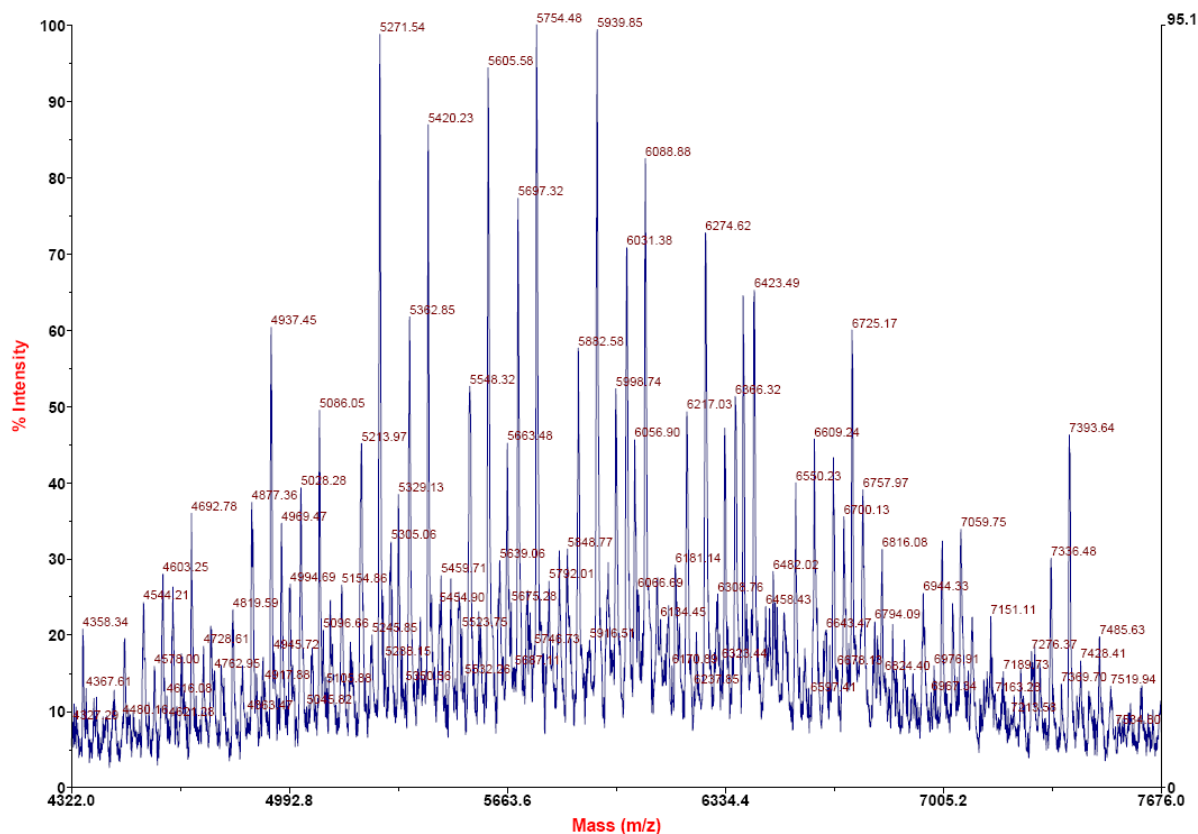

Figure S1. Zoomed-in mass spectrum of the 7 hr reaction product of  $\text{Au}_{25}^0$  with NaBr in acetone.

**Table S1.** Assignment of mass peaks shown in Figure S1.

| Peaks   | Assigned Formula                                                                   | Cal. Mass | Deviation |
|---------|------------------------------------------------------------------------------------|-----------|-----------|
| 7393.64 | <b>Au<sub>25</sub>(SC<sub>2</sub>H<sub>4</sub>Ph)<sub>18</sub></b>                 | 7393.72   | -0.08     |
| 7059.75 | Au <sub>24</sub> (SC <sub>2</sub> H <sub>4</sub> Ph) <sub>17</sub>                 | 7059.52   | 0.23      |
| 6757.97 | Au <sub>23</sub> (SC <sub>2</sub> H <sub>4</sub> Ph) <sub>16</sub> S               | 6757.37   | 0.6       |
| 6725.17 | Au <sub>23</sub> (SC <sub>2</sub> H <sub>4</sub> Ph) <sub>16</sub>                 | 6725.31   | -0.14     |
| 6423.49 | Au <sub>22</sub> (SC <sub>2</sub> H <sub>4</sub> Ph) <sub>15</sub> S               | 6423.15   | 0.34      |
| 6389.51 | Au <sub>22</sub> (SC <sub>2</sub> H <sub>4</sub> Ph) <sub>15</sub>                 | 6391.09   | -1.58     |
| 6088.82 | Au <sub>21</sub> (SC <sub>2</sub> H <sub>4</sub> Ph) <sub>14</sub> S               | 6088.94   | -0.12     |
| 6056.9  | Au <sub>21</sub> (SC <sub>2</sub> H <sub>4</sub> Ph) <sub>14</sub>                 | 6056.9    | 0         |
| 5754.48 | Au <sub>20</sub> (SC <sub>2</sub> H <sub>4</sub> Ph) <sub>13</sub> S               | 5754.77   | -0.29     |
| 5420.23 | Au <sub>19</sub> (SC <sub>2</sub> H <sub>4</sub> Ph) <sub>12</sub> S               | 5420.62   | -0.39     |
| 5086.05 | Au <sub>18</sub> (SC <sub>2</sub> H <sub>4</sub> Ph) <sub>11</sub> S               | 5086.42   | -0.37     |
| 7336.52 | <b>Au<sub>25</sub>(SC<sub>2</sub>H<sub>4</sub>Ph)<sub>17</sub>Br</b>               | 7336.53   | -0.01     |
| 7276.37 | Au <sub>25</sub> (SC <sub>2</sub> H <sub>4</sub> Ph) <sub>16</sub> Br <sub>2</sub> | 7279.26   | -2.89     |
| 7001.80 | Au <sub>24</sub> (SC <sub>2</sub> H <sub>4</sub> Ph) <sub>16</sub> Br              | 7002.36   | -0.56     |
| 6944.33 | Au <sub>24</sub> (SC <sub>2</sub> H <sub>4</sub> Ph) <sub>15</sub> Br <sub>2</sub> | 6945.07   | -0.74     |
| 6667.04 | Au <sub>23</sub> (SC <sub>2</sub> H <sub>4</sub> Ph) <sub>15</sub> Br              | 6668.18   | -1.14     |
| 6609.24 | Au <sub>23</sub> (SC <sub>2</sub> H <sub>4</sub> Ph) <sub>14</sub> Br <sub>2</sub> | 6610.9    | -1.66     |
| 6550.23 | Au <sub>23</sub> (SC <sub>2</sub> H <sub>4</sub> Ph) <sub>13</sub> Br <sub>3</sub> | 6553.77   | -3.54     |
| 6366.32 | Au <sub>22</sub> (SC <sub>2</sub> H <sub>4</sub> Ph) <sub>14</sub> BrS             | 6366.19   | 0.13      |
| 6332.88 | Au <sub>22</sub> (SC <sub>2</sub> H <sub>4</sub> Ph) <sub>14</sub> Br              | 6334.15   | -1.27     |
| 6274.62 | Au <sub>22</sub> (SC <sub>2</sub> H <sub>4</sub> Ph) <sub>13</sub> Br <sub>2</sub> | 6276.72   | -2.1      |
| 6217.03 | Au <sub>22</sub> (SC <sub>2</sub> H <sub>4</sub> Ph) <sub>12</sub> Br <sub>3</sub> | 6219.42   | -2.39     |
| 6031.38 | Au <sub>21</sub> (SC <sub>2</sub> H <sub>4</sub> Ph) <sub>13</sub> BrS             | 6032.03   | -0.65     |
| 5998.74 | Au <sub>21</sub> (SC <sub>2</sub> H <sub>4</sub> Ph) <sub>13</sub> Br              | 5999.99   | -1.25     |
| 5939.85 | Au <sub>21</sub> (SC <sub>2</sub> H <sub>4</sub> Ph) <sub>12</sub> Br <sub>2</sub> | 5942.55   | -2.7      |
| 5882.58 | Au <sub>21</sub> (SC <sub>2</sub> H <sub>4</sub> Ph) <sub>11</sub> Br <sub>3</sub> | 5885.24   | -2.66     |
| 5697.32 | Au <sub>20</sub> (SC <sub>2</sub> H <sub>4</sub> Ph) <sub>12</sub> BrS             | 5697.80   | -0.48     |
| 5605.58 | Au <sub>20</sub> (SC <sub>2</sub> H <sub>4</sub> Ph) <sub>11</sub> Br <sub>2</sub> | 5608.39   | -2.81     |
| 5548.32 | Au <sub>20</sub> (SC <sub>2</sub> H <sub>4</sub> Ph) <sub>10</sub> Br <sub>3</sub> | 5551.20   | -2.88     |
| 5362.85 | Au <sub>19</sub> (SC <sub>2</sub> H <sub>4</sub> Ph) <sub>11</sub> BrS             | 5363.64   | -0.79     |
| 5271.54 | Au <sub>19</sub> (SC <sub>2</sub> H <sub>4</sub> Ph) <sub>10</sub> Br <sub>2</sub> | 5274.2    | -2.66     |
| 4937.45 | Au <sub>18</sub> (SC <sub>2</sub> H <sub>4</sub> Ph) <sub>9</sub> Br <sub>2</sub>  | 4940.01   | -2.56     |

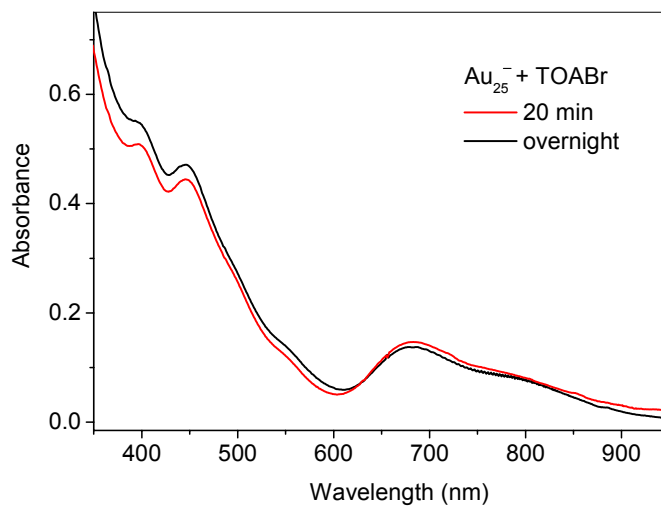

**Figure S2.** Stability of  $\text{Au}_{25}^-$  (0.5 mg/2 mL  $\text{CH}_2\text{Cl}_2$ ) in the presence of excess TOABr (10 eqs).  $\text{Au}_{25}^-$  shows no changes after ~12 hr.

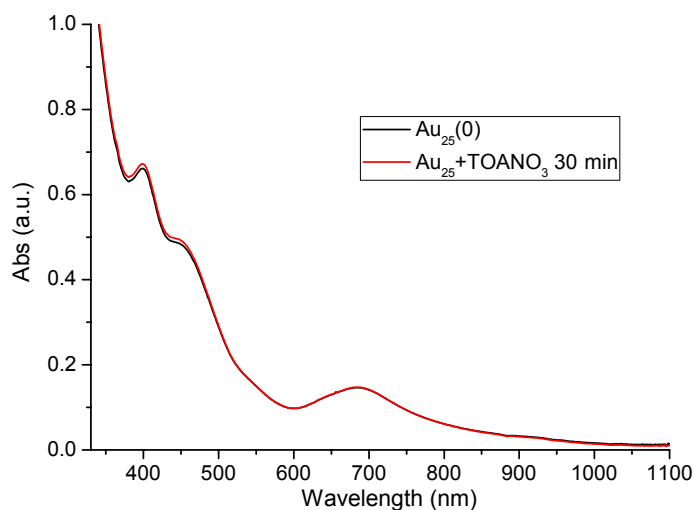

**Figure S3.** Stability of  $\text{Au}_{25}^0$  (0.5mg/2ml  $\text{CH}_2\text{Cl}_2$ ) in the presence of excess  $\text{TOANO}_3$ . No changes was observed within 12 h (longer time not tested). In the figure, only the 30 min spectrum was shown.

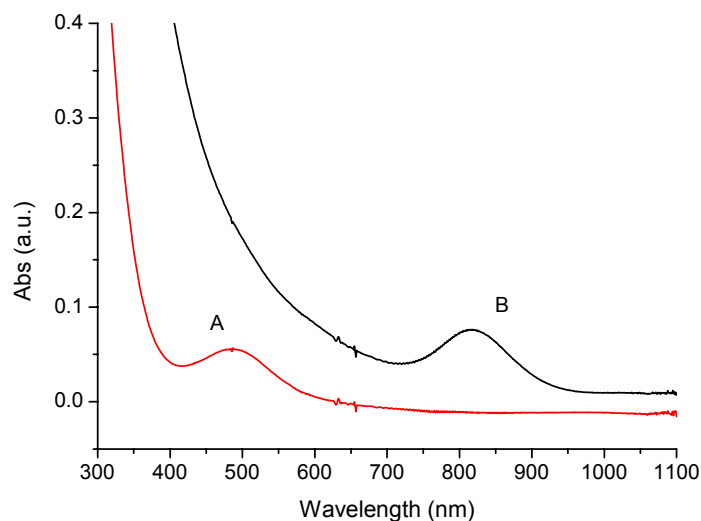

**Figure S4.** Reaction of  $\text{Au}_{25}^0$  with *excess* NaI. Adding NaI at a ratio of  $\text{Au}_{25}^0/\text{NaI}=8/7$  leads to immediate conversion of  $\text{Au}_{25}^0$  to  $\text{Au}_{25}^-$ . Adding excess NaI ( $> 5$  equivalents) leads to cluster decomposition after overnight. HPLC shows species B (see figure for its absorption spectrum), presumably a Au(I) complex. It is initially soluble in toluene, but after being dry under nitrogen, the majority can no longer be dissolved in toluene, perhaps due to aggregation or polymerization of Au(I), only a little amount can be dissolved in toluene, which shows spectrum A (see figure). This product seems quite labile and has not been identified.
